# Supplementary material for: Habitual Diet Pattern Associations with Gut Microbiome Diversity and Composition: Results from a Chinese Adult Cohort
Source: MDPI journal article supplement (doi:10.3390/nu14132639), 2022-06-25
Supplement: s1 [file s1]

## Supplementary materials

### Supplementary Method 1. Dietary pattern analysis

The pattern loadings from the factor analysis in Supplementary Table S1 showed that the first factor had high loadings on eggs, dairy, whole grain and fruits (absolute value of factor loading larger than 0.45). The second factor showed high loadings on refined grains and fruits and a negative high loading on cooked meat. The third factor has high loadings on red meat and white meat. These three factors totally explained 50% of the whole variance of food intake frequencies. We subsequently conducted a cluster analysis based on the factor scores for each factor and each participant calculated by summing the consumption of each food group that was weighted by its factor loading. The optimal number of clusters was selected by 30 indices serving as measurement metrics of clustering performance using R package “NbClust”. Using K-means clustering method, we finally cluster the participants into 3 groups according the aforementioned common factor scores.

### Supplementary Method 2. MaAsLin

MaAsLin is a multivariate statistical framework that finds associations between metadata and relative abundances of specific microbial community members. MaAsLin first deconfounds and selects, among metadata, factors most potentially associated with microbial abundance. Selected factors are then included in general linear models using metadata as predictors and taxa arcsin-square root-transformed abundances as the response. Phyla, genera, and species were filtered out if their relative abundance and prevalence were <0.01% and <1%, respectively. The number of tests performed was high for MaAsLin, therefore P values were adjusted for multiple testing using the Benjamini–Hochberg method with a 10% false discovery rate.

**Supplementary Table S1.** Factor loading matrix of major factors by principal component analysis with varimax rotation.

|                    | PA1          | PA2           | PA3          |
|--------------------|--------------|---------------|--------------|
| Red meat           | -0.051       | 0.149         | <b>0.678</b> |
| White meat         | 0.142        | 0.007         | <b>0.644</b> |
| Eggs               | <b>0.678</b> | -0.045        | 0.172        |
| Dairy              | <b>0.651</b> | -0.419        | 0.159        |
| Cooked meat        | 0.3          | <b>-0.498</b> | 0.322        |
| Refined grain      | -0.047       | <b>0.707</b>  | 0.17         |
| Whole grain        | <b>0.65</b>  | -0.043        | -0.003       |
| Fruits             | <b>0.689</b> | 0.065         | -0.042       |
| Vegetables         | 0.056        | <b>0.756</b>  | 0.122        |
| Explained variance | 21%          | 17%           | 12%          |

Figures in bold indicate absolute factor loading are more than 0.45. PA, Principal axis.

**Supplementary Table S2.** Classification of subjects by cluster analysis using factor score.

|          | Cluster A      | Cluster B     | Cluster C      |
|----------|----------------|---------------|----------------|
| Factor 1 | -0.413 ± 0.438 | 1.708 ± 0.721 | 0.131 ± 0.653  |
| Factor 2 | 0.457 ± 0.333  | 0.351 ± 0.598 | -1.253 ± 0.611 |
| Factor 3 | 0.077 ± 0.717  | 0.173 ± 1.139 | -0.267 ± 0.763 |

**Supplementary Table S3.** Dietary patterns identified by K-means clustering.

|               | Cluster A      | Cluster B      | Cluster C     |
|---------------|----------------|----------------|---------------|
| Red meat      | 7.547 ± 4.123  | 7.011 ± 4.744  | 5.077 ± 3.066 |
| White meat    | 4.579 ± 3.68   | 5.756 ± 4.572  | 4.132 ± 2.718 |
| Eggs          | 3.621 ± 2.782  | 9.856 ± 3.916  | 5.143 ± 2.459 |
| Dairy         | 0.726 ± 1.64   | 6.367 ± 4.536  | 4.659 ± 3.089 |
| Cooked meat   | 0.116 ± 0.52   | 2.211 ± 4.312  | 2.407 ± 3.565 |
| Refined grain | 13.679 ± 1.699 | 13.356 ± 2.27  | 6.385 ± 3.66  |
| Whole grain   | 2.186 ± 2.546  | 10.056 ± 4.665 | 4.566 ± 2.968 |
| Fruits        | 3.749 ± 3.619  | 12.233 ± 3.435 | 5.154 ± 2.761 |
| Vegetables    | 13.133 ± 2.354 | 13.533 ± 1.756 | 6.363 ± 3.262 |

**Supplementary Table S4.** Region distributions of 702 participants according to the established dietary patterns.

| Region                     | Cluster A   | Cluster B  | Cluster C  |
|----------------------------|-------------|------------|------------|
| Changsha, Hunan province   | 69 (36.3%)  | 32 (16.8%) | 89 (46.8%) |
| Hefei, Anhui province      | 47 (51.1%)  | 11 (12%)   | 34 (37%)   |
| Kunming, Yunan province    | 7 (50.0%)   | 5 (35.7%)  | 2 (14.3%)  |
| Lanxi, Zhejiang province   | 137 (89%)   | 1 (0.6%)   | 16 (10.4%) |
| Taizhou, Zhejiang province | 157 (95.7%) | 4 (2.4%)   | 3 (1.8%)   |
| Xuzhou, Jiangsu province   | 13 (14.8%)  | 37 (42%)   | 38 (43.2%) |

**Supplementary Table S5.** Sensitivity analysis of associations between food intakes and gut microbial profiles using MaAsLins with population at a high risk of intestinal diseases removed,  $N=479$ .

| Food group    | Phylum               | Class   Order   Family                   | Genus                            | Species           | Value  | Coef <sup>1</sup> | Coverage (%) <sup>2</sup> | Pval <sup>3</sup> | Qval <sup>4</sup> |
|---------------|----------------------|------------------------------------------|----------------------------------|-------------------|--------|-------------------|---------------------------|-------------------|-------------------|
| Red meat      | <i>Firmicutes</i>    | <i>Bacilli</i>   <i>Lactobacillales</i>  | <i>Weissella</i>                 | <i>uncultured</i> | pd     | -0.0507           | 27.14%                    | <0.0001           | 0.0711            |
|               |                      | <i>Leuconostocaceae</i>                  |                                  | <i>organism</i>   |        |                   |                           |                   |                   |
| Red meat      | <i>Firmicutes</i>    | <i>Bacilli</i>   <i>Lactobacillales</i>  | <i>Weissella</i>                 |                   | pd     | -0.0502           | 28.81%                    | <0.0001           | 0.0711            |
|               |                      | <i>Leuconostocaceae</i>                  |                                  |                   |        |                   |                           |                   |                   |
| Red meat      | <i>Firmicutes</i>    | <i>Bacilli</i>   <i>Lactobacillales</i>  | <i>Weissella</i>                 | <i>uncultured</i> | mul_pw | -0.0471           | 27.14%                    | 0.0001            | 0.0804            |
|               |                      | <i>Leuconostocaceae</i>                  |                                  | <i>organism</i>   |        |                   |                           |                   |                   |
| Cooked meat   | <i>Bacteroidetes</i> | <i>Bacteroidia</i>                       | <i>Coprobacter</i>               |                   | pd     | 0.0172            | 14.61%                    | <0.0001           | 0.0195            |
|               |                      | <i>Bacteroidales</i>                     |                                  |                   |        |                   |                           |                   |                   |
|               |                      | <i>Barnesiellaceae</i>                   |                                  |                   |        |                   |                           |                   |                   |
| Cooked meat   | <i>Firmicutes</i>    | <i>Clostridia</i>   <i>Clostridiales</i> | <i>Eubacterium eligens group</i> | <i>uncultured</i> | mul_pw | 0.0493            | 65.14%                    | <0.0001           | 0.0430            |
|               |                      | <i>Lachnospiraceae</i>                   |                                  | <i>organism</i>   |        |                   |                           |                   |                   |
| Cooked meat   | <i>Firmicutes</i>    | <i>Clostridia</i>   <i>Clostridiales</i> | <i>uncultured</i>                | <i>uncultured</i> | mul_pw | 0.0123            | 34.24%                    | <0.0001           | 0.0430            |
|               |                      | <i>Lachnospiraceae</i>                   |                                  | <i>organism</i>   |        |                   |                           |                   |                   |
| Cooked meat   | <i>Firmicutes</i>    | <i>Clostridia</i>   <i>Clostridiales</i> | <i>Eubacterium eligens group</i> |                   | mul_pw | 0.0491            | 65.14%                    | <0.0001           | 0.0430            |
|               |                      | <i>Lachnospiraceae</i>                   |                                  |                   |        |                   |                           |                   |                   |
| Cooked meat   | <i>Bacteroidetes</i> | <i>Bacteroidia</i>                       | <i>Paraprevotella</i>            | <i>uncultured</i> | pd     | 0.0299            | 11.27%                    | 0.0001            | 0.0495            |
|               |                      | <i>Bacteroidales</i>                     |                                  | <i>organism</i>   |        |                   |                           |                   |                   |
|               |                      | <i>Prevotellaceae</i>                    |                                  |                   |        |                   |                           |                   |                   |
| Whole grain   | <i>Firmicutes</i>    | <i>Negativicutes</i>                     | <i>Megasphaera</i>               | <i>uncultured</i> | mul_pd | 0.0515            | 13.15%                    | <0.0001           | 0.0425            |
|               |                      | <i>Veillonellales</i>                    |                                  | <i>organism</i>   |        |                   |                           |                   |                   |
|               |                      | <i>Veillonellaceae</i>                   |                                  |                   |        |                   |                           |                   |                   |
| Refined grain | <i>Firmicutes</i>    | <i>Bacilli</i>   <i>Lactobacillales</i>  |                                  | <i>uncultured</i> | pw     | 0.0959            | 12.94%                    | <0.0001           | 0.0026            |
|               |                      | <i>Lactobacillaceae</i>                  |                                  | <i>organism</i>   |        |                   |                           |                   |                   |

|               |                   |                                                                      |                                            |                                      |        |         |        |         |         |
|---------------|-------------------|----------------------------------------------------------------------|--------------------------------------------|--------------------------------------|--------|---------|--------|---------|---------|
| Refined grain | <i>Firmicutes</i> | <i>Clostridia</i>   <i>Clostridiales</i>  <br><i>Ruminococcaceae</i> | <i>Eubacterium coprostanoligenes</i> group | <i>uncultured</i><br><i>organism</i> | mul_pd | -0.0443 | 18.58% | <0.0001 | 0.0249  |
| Refined grain | <i>Firmicutes</i> | <i>Clostridia</i>   <i>Clostridiales</i>  <br><i>Ruminococcaceae</i> | <i>Eubacterium coprostanoligenes</i> group | <i>uncultured</i><br><i>organism</i> | pd     | -0.0455 | 18.58% | <0.0001 | 0.0249  |
| Refined grain | <i>Firmicutes</i> | <i>Bacilli</i>   <i>Lactobacillales</i>  <br><i>Lactobacillaceae</i> | <i>Lactobacillus</i>                       | <i>Lactobacillus mucosae</i>         | pw     | 0.0677  | 15.24% | 0.0001  | 0.0506  |
| Refined grain | <i>Firmicutes</i> | <i>Bacilli</i>   <i>Lactobacillales</i>  <br><i>Lactobacillaceae</i> | <i>Lactobacillus</i>                       |                                      | pw     | 0.1565  | 49.69% | 0.0001  | 0.0750  |
| Refined grain | <i>Firmicutes</i> | <i>Clostridia</i>   <i>Clostridiales</i>  <br><i>Ruminococcaceae</i> | <i>Eubacterium coprostanoligenes</i> group | <i>uncultured</i><br><i>organism</i> | mul_pw | -0.0408 | 18.58% | 0.0002  | 0.0842  |
| Refined grain | <i>Firmicutes</i> | <i>Clostridia</i>   <i>Clostridiales</i>  <br><i>Ruminococcaceae</i> | <i>Ruminococcaceae</i> UCG 013             |                                      | pw     | -0.0734 | 74.95% | 0.0002  | 0.0842  |
| Vegetables    | <i>Firmicutes</i> | <i>Clostridia</i>   <i>Clostridiales</i>  <br><i>Ruminococcaceae</i> | <i>Eubacterium coprostanoligenes</i> group | <i>uncultured</i><br><i>organism</i> | mul_pd | -0.3279 | 24.84% | <0.0001 | <0.0001 |
| Vegetables    | <i>Firmicutes</i> | <i>Clostridia</i>   <i>Clostridiales</i>  <br><i>Ruminococcaceae</i> | <i>Eubacterium coprostanoligenes</i> group | <i>uncultured</i><br><i>organism</i> | pd     | -0.3281 | 24.84% | <0.0001 | <0.0001 |
| Vegetables    | <i>Firmicutes</i> | <i>Clostridia</i>   <i>Clostridiales</i>  <br><i>Ruminococcaceae</i> | <i>Eubacterium coprostanoligenes</i> group | <i>uncultured</i><br><i>organism</i> | mul_pw | -0.3233 | 24.84% | <0.0001 | <0.0001 |
| Vegetables    | <i>Firmicutes</i> | <i>Clostridia</i>   <i>Clostridiales</i>  <br><i>Ruminococcaceae</i> | <i>Eubacterium coprostanoligenes</i> group | <i>uncultured</i><br><i>organism</i> | pw     | -0.3290 | 24.84% | <0.0001 | <0.0001 |
| Vegetables    | <i>Firmicutes</i> | <i>Clostridia</i>   <i>Clostridiales</i>  <br><i>Ruminococcaceae</i> | <i>Eubacterium coprostanoligenes</i> group |                                      | pd     | -0.2894 | 70.35% | <0.0001 | 0.0001  |
| Vegetables    | <i>Firmicutes</i> | <i>Clostridia</i>   <i>Clostridiales</i>  <br><i>Ruminococcaceae</i> | <i>Eubacterium coprostanoligenes</i> group |                                      | mul_pd | -0.2822 | 70.35% | <0.0001 | 0.0001  |
| Vegetables    | <i>Firmicutes</i> | <i>Clostridia</i>   <i>Clostridiales</i>  <br><i>Ruminococcaceae</i> | <i>Eubacterium coprostanoligenes</i> group |                                      | mul_pw | -0.2795 | 70.35% | <0.0001 | 0.0001  |

|            |                      |                                                                                    |                                            |                                      |        |         |        |         |        |
|------------|----------------------|------------------------------------------------------------------------------------|--------------------------------------------|--------------------------------------|--------|---------|--------|---------|--------|
| Vegetables | <i>Firmicutes</i>    | <i>Erysipelotrichia</i><br><i>Erysipelotrichales</i><br><i>Erysipelotrichaceae</i> | <i>Turicibacter</i>                        | <i>uncultured</i><br><i>organism</i> | pd     | -0.0774 | 13.36% | <0.0001 | 0.0002 |
| Vegetables | <i>Firmicutes</i>    | <i>Erysipelotrichia</i><br><i>Erysipelotrichales</i><br><i>Erysipelotrichaceae</i> | <i>Turicibacter</i>                        | <i>uncultured</i><br><i>organism</i> | mul_pw | -0.0788 | 13.36% | <0.0001 | 0.0002 |
| Vegetables | <i>Firmicutes</i>    | <i>Erysipelotrichia</i><br><i>Erysipelotrichales</i><br><i>Erysipelotrichaceae</i> | <i>Turicibacter</i>                        | <i>uncultured</i><br><i>organism</i> | pw     | -0.0812 | 13.36% | <0.0001 | 0.0002 |
| Vegetables | <i>Firmicutes</i>    | <i>Erysipelotrichia</i><br><i>Erysipelotrichales</i><br><i>Erysipelotrichaceae</i> | <i>Turicibacter</i>                        | <i>uncultured</i><br><i>organism</i> | mul_pd | -0.0758 | 13.36% | <0.0001 | 0.0002 |
| Vegetables | <i>Firmicutes</i>    | <i>Clostridia</i>   <i>Clostridiales</i><br><i>Ruminococcaceae</i>                 | <i>Eubacterium coprostanoligenes</i> group |                                      | pw     | -0.2747 | 70.35% | <0.0001 | 0.0003 |
| Vegetables | <i>Bacteroidetes</i> | <i>Bacteroidia</i><br><i>Bacteroidales</i><br><i>Barnesiellaceae</i>               | <i>Barnesiella</i>                         | <i>uncultured</i><br><i>organism</i> | pd     | -0.0533 | 10.44% | <0.0001 | 0.0079 |
| Vegetables | <i>Bacteroidetes</i> | <i>Bacteroidia</i><br><i>Bacteroidales</i><br><i>Barnesiellaceae</i>               | <i>Barnesiella</i>                         | <i>uncultured</i><br><i>organism</i> | mul_pw | -0.0532 | 10.44% | <0.0001 | 0.0097 |
| Vegetables | <i>Bacteroidetes</i> | <i>Bacteroidia</i><br><i>Bacteroidales</i><br><i>Barnesiellaceae</i>               | <i>Barnesiella</i>                         | <i>uncultured</i><br><i>organism</i> | mul_pd | -0.0517 | 10.44% | <0.0001 | 0.0115 |
| Vegetables | <i>Firmicutes</i>    | <i>Clostridia</i>   <i>Clostridiales</i><br><i>Ruminococcaceae</i>                 | <i>uncultured</i>                          | <i>uncultured</i><br><i>organism</i> | mul_pw | -0.0611 | 14.82% | 0.0001  | 0.0169 |
| Vegetables | <i>Firmicutes</i>    | <i>Clostridia</i>   <i>Clostridiales</i>                                           | <i>uncultured</i>                          | <i>uncultured</i>                    | pd     | -0.0598 | 14.82% | 0.0001  | 0.0176 |

|            |                      |                                                                                 |  |                   |        |         |        |        |        |
|------------|----------------------|---------------------------------------------------------------------------------|--|-------------------|--------|---------|--------|--------|--------|
|            |                      | <i>Ruminococcaceae</i>                                                          |  | <i>organism</i>   |        |         |        |        |        |
| Vegetables | <i>Firmicutes</i>    | <i>Clostridia</i>   <i>Clostridiales</i>   <i>Ruminococcaceae</i> UCG 005       |  | <i>uncultured</i> | pw     | -0.0600 | 11.69% | 0.0001 | 0.0221 |
|            |                      | <i>Ruminococcaceae</i>                                                          |  | <i>organism</i>   |        |         |        |        |        |
| Vegetables | <i>Firmicutes</i>    | <i>Clostridia</i>   <i>Clostridiales</i>   <i>Oscillibacter</i>                 |  | <i>uncultured</i> | pd     | -0.0269 | 10.02% | 0.0001 | 0.0233 |
|            |                      | <i>Ruminococcaceae</i>                                                          |  | <i>organism</i>   |        |         |        |        |        |
| Vegetables | <i>Firmicutes</i>    | <i>Clostridia</i>   <i>Clostridiales</i>   <i>Oscillibacter</i>                 |  | <i>uncultured</i> | pw     | -0.0281 | 10.02% | 0.0001 | 0.0233 |
|            |                      | <i>Ruminococcaceae</i>                                                          |  | <i>organism</i>   |        |         |        |        |        |
| Vegetables | <i>Firmicutes</i>    | <i>Clostridia</i>   <i>Clostridiales</i>   <i>uncultured</i>                    |  | <i>uncultured</i> | mul_pd | -0.0578 | 14.82% | 0.0001 | 0.0233 |
|            |                      | <i>Ruminococcaceae</i>                                                          |  | <i>organism</i>   |        |         |        |        |        |
| Vegetables | <i>Firmicutes</i>    | <i>Clostridia</i>   <i>Clostridiales</i>   <i>Ruminococcaceae</i> UCG 002       |  | <i>uncultured</i> | pw     | -0.1215 | 23.80% | 0.0001 | 0.0241 |
|            |                      | <i>Ruminococcaceae</i>                                                          |  | <i>organism</i>   |        |         |        |        |        |
| Vegetables | <i>Bacteroidetes</i> | <i>Bacteroidia</i>   <i>Barnesiella</i>                                         |  | <i>uncultured</i> | pw     | -0.0500 | 10.44% | 0.0001 | 0.0242 |
|            |                      | <i>Bacteroidales</i>                                                            |  | <i>organism</i>   |        |         |        |        |        |
|            |                      | <i>Barnesiellaceae</i>                                                          |  |                   |        |         |        |        |        |
| Vegetables | <i>Firmicutes</i>    | <i>Clostridia</i>   <i>Clostridiales</i>   <i>Ruminococcaceae</i> UCG 005       |  | <i>uncultured</i> | mul_pw | -0.0563 | 11.69% | 0.0001 | 0.0242 |
|            |                      | <i>Ruminococcaceae</i>                                                          |  | <i>organism</i>   |        |         |        |        |        |
| Vegetables | <i>Firmicutes</i>    | <i>Clostridia</i>   <i>Clostridiales</i>   <i>uncultured</i>                    |  | <i>uncultured</i> | pw     | -0.0600 | 14.82% | 0.0001 | 0.0242 |
|            |                      | <i>Ruminococcaceae</i>                                                          |  | <i>organism</i>   |        |         |        |        |        |
| Vegetables | <i>Firmicutes</i>    | <i>Clostridia</i>   <i>Clostridiales</i>   <i>Oscillibacter</i>                 |  | <i>uncultured</i> | mul_pd | -0.0260 | 10.02% | 0.0001 | 0.0262 |
|            |                      | <i>Ruminococcaceae</i>                                                          |  | <i>organism</i>   |        |         |        |        |        |
| Vegetables | <i>Firmicutes</i>    | <i>Clostridia</i>   <i>Clostridiales</i>   <i>Oscillibacter</i>                 |  | <i>uncultured</i> | mul_pw | -0.0260 | 10.02% | 0.0002 | 0.0312 |
|            |                      | <i>Ruminococcaceae</i>                                                          |  | <i>organism</i>   |        |         |        |        |        |
| Vegetables | <i>Firmicutes</i>    | <i>Clostridia</i>   <i>Clostridiales</i>   <i>Ruminococcaceae</i> UCG 005       |  | <i>uncultured</i> | pd     | -0.0540 | 11.69% | 0.0002 | 0.0312 |
|            |                      | <i>Ruminococcaceae</i>                                                          |  | <i>organism</i>   |        |         |        |        |        |
| Vegetables | <i>Firmicutes</i>    | <i>Clostridia</i>   <i>Clostridiales</i>   <i>Christensenellaceae</i> R 7 group |  | <i>uncultured</i> | pd     | -0.1159 | 28.39% | 0.0002 | 0.0327 |
|            |                      | <i>Christensenellaceae</i>                                                      |  | <i>organism</i>   |        |         |        |        |        |

|            |                       |                                                                                    |  |                                      |                                      |        |         |        |        |        |
|------------|-----------------------|------------------------------------------------------------------------------------|--|--------------------------------------|--------------------------------------|--------|---------|--------|--------|--------|
| Vegetables | <i>Actinobacteria</i> | <i>Coriobacteriia</i><br><i>Coriobacteriales</i><br><i>Eggerthellaceae</i>         |  | <i>Adlercreutzia</i>                 | <i>uncultured</i><br><i>organism</i> | pd     | -0.0774 | 45.93% | 0.0002 | 0.0332 |
| Vegetables | <i>Actinobacteria</i> | <i>Coriobacteriia</i><br><i>Coriobacteriales</i><br><i>Eggerthellaceae</i>         |  | <i>Adlercreutzia</i>                 |                                      | pd     | -0.0774 | 45.93% | 0.0002 | 0.0332 |
| Vegetables | <i>Firmicutes</i>     | <i>Clostridia</i>   <i>Clostridiales</i><br><i>Christensenellaceae</i>             |  | <i>Christensenellaceae</i> R 7 group | <i>uncultured</i><br><i>organism</i> | mul_pd | -0.1146 | 28.39% | 0.0002 | 0.0335 |
| Vegetables | <i>Actinobacteria</i> | <i>Coriobacteriia</i><br><i>Coriobacteriales</i><br><i>Eggerthellaceae</i>         |  | <i>Adlercreutzia</i>                 | <i>uncultured</i><br><i>organism</i> | mul_pd | -0.0762 | 45.93% | 0.0003 | 0.0360 |
| Vegetables | <i>Firmicutes</i>     | <i>Clostridia</i>   <i>Clostridiales</i><br><i>Ruminococcaceae</i>                 |  | <i>Ruminococcaceae</i> UCG 005       | <i>uncultured</i><br><i>organism</i> | mul_pd | -0.0525 | 11.69% | 0.0003 | 0.0360 |
| Vegetables | <i>Actinobacteria</i> | <i>Coriobacteriia</i><br><i>Coriobacteriales</i><br><i>Eggerthellaceae</i>         |  | <i>Adlercreutzia</i>                 |                                      | mul_pd | -0.0762 | 45.93% | 0.0003 | 0.0360 |
| Vegetables | <i>Firmicutes</i>     | <i>Erysipelotrichia</i><br><i>Erysipelotrichales</i><br><i>Erysipelotrichaceae</i> |  | <i>Turicibacter</i>                  |                                      | pw     | -0.1032 | 42.59% | 0.0003 | 0.0407 |
| Vegetables | <i>Firmicutes</i>     | <i>Clostridia</i>   <i>Clostridiales</i><br><i>Ruminococcaceae</i>                 |  | <i>Ruminococcaceae</i> UCG 002       | <i>uncultured</i><br><i>organism</i> | mul_pd | -0.1067 | 23.80% | 0.0003 | 0.0421 |
| Vegetables | <i>Firmicutes</i>     | <i>Clostridia</i>   <i>Clostridiales</i><br><i>Ruminococcaceae</i>                 |  | <i>Ruminococcaceae</i> UCG 003       | <i>uncultured</i><br><i>organism</i> | pw     | -0.1349 | 57.83% | 0.0003 | 0.0435 |
| Vegetables | <i>Firmicutes</i>     | <i>Clostridia</i>   <i>Clostridiales</i><br><i>Christensenellaceae</i>             |  | <i>Christensenellaceae</i> R 7 group | <i>uncultured</i><br><i>organism</i> | pw     | -0.1151 | 28.39% | 0.0004 | 0.0492 |
| Vegetables | <i>Firmicutes</i>     | <i>Clostridia</i>   <i>Clostridiales</i>                                           |  | <i>Ruminococcaceae</i> UCG 002       | <i>uncultured</i>                    | pd     | -0.1034 | 23.80% | 0.0005 | 0.0583 |

|            |                       |                                          |                                      |                   |        |         |        |        |        |
|------------|-----------------------|------------------------------------------|--------------------------------------|-------------------|--------|---------|--------|--------|--------|
|            |                       | <i>Ruminococcaceae</i>                   |                                      | <i>organism</i>   |        |         |        |        |        |
| Vegetables | <i>Firmicutes</i>     | <i>Clostridia</i>   <i>Clostridiales</i> | <i>Ruminococcaceae</i> UCG 003       | <i>uncultured</i> | mul_pw | -0.1036 | 23.80% | 0.0006 | 0.0606 |
|            |                       | <i>Ruminococcaceae</i>                   |                                      | <i>organism</i>   |        |         |        |        |        |
| Vegetables | <i>Actinobacteria</i> | <i>Coriobacteriia</i>                    | <i>Adlercreutzia</i>                 | <i>uncultured</i> | mul_pw | -0.0722 | 45.93% | 0.0007 | 0.0629 |
|            |                       | <i>Coriobacteriales</i>                  |                                      | <i>organism</i>   |        |         |        |        |        |
|            |                       | <i>Eggerthellaceae</i>                   |                                      |                   |        |         |        |        |        |
| Vegetables | <i>Actinobacteria</i> | <i>Coriobacteriia</i>                    | <i>Adlercreutzia</i>                 |                   | mul_pw | -0.0722 | 45.93% | 0.0007 | 0.0629 |
|            |                       | <i>Coriobacteriales</i>                  |                                      |                   |        |         |        |        |        |
|            |                       | <i>Eggerthellaceae</i>                   |                                      |                   |        |         |        |        |        |
| Vegetables | <i>Firmicutes</i>     | <i>Clostridia</i>   <i>Clostridiales</i> | <i>Ruminococcaceae</i> UCG 002       | <i>uncultured</i> | pd     | -0.1215 | 57.83% | 0.0007 | 0.0674 |
|            |                       | <i>Ruminococcaceae</i>                   |                                      | <i>organism</i>   |        |         |        |        |        |
| Vegetables | <i>Firmicutes</i>     | <i>Clostridia</i>   <i>Clostridiales</i> | <i>Christensenellaceae</i> R 7 group | <i>uncultured</i> | mul_pw | -0.1046 | 28.39% | 0.0009 | 0.0796 |
|            |                       | <i>Christensenellaceae</i>               |                                      | <i>organism</i>   |        |         |        |        |        |
| Vegetables | <i>Firmicutes</i>     | <i>Erysipelotrichia</i>                  | <i>Turicibacter</i>                  |                   | mul_pw | -0.0913 | 42.59% | 0.0009 | 0.0802 |
|            |                       | <i>Erysipelotrichales</i>                |                                      |                   |        |         |        |        |        |
|            |                       | <i>Erysipelotrichaceae</i>               |                                      |                   |        |         |        |        |        |
| Vegetables | <i>Actinobacteria</i> | <i>Coriobacteriia</i>                    | <i>Adlercreutzia</i>                 | <i>uncultured</i> | pw     | -0.0722 | 45.93% | 0.0010 | 0.0835 |
|            |                       | <i>Coriobacteriales</i>                  |                                      | <i>organism</i>   |        |         |        |        |        |
|            |                       | <i>Eggerthellaceae</i>                   |                                      |                   |        |         |        |        |        |
| Vegetables | <i>Actinobacteria</i> | <i>Coriobacteriia</i>                    | <i>Adlercreutzia</i>                 |                   | pw     | -0.0722 | 45.93% | 0.0010 | 0.0835 |
|            |                       | <i>Coriobacteriales</i>                  |                                      |                   |        |         |        |        |        |
|            |                       | <i>Eggerthellaceae</i>                   |                                      |                   |        |         |        |        |        |
| Vegetables | <i>Firmicutes</i>     | <i>Clostridia</i>   <i>Clostridiales</i> | <i>Ruminococcaceae</i> UCG 002       | <i>uncultured</i> | mul_pd | -0.1159 | 57.83% | 0.0012 | 0.0950 |
|            |                       | <i>Ruminococcaceae</i>                   |                                      | <i>organism</i>   |        |         |        |        |        |
| Vegetables | <i>Firmicutes</i>     | <i>Erysipelotrichia</i>                  | <i>Turicibacter</i>                  |                   | pd     | -0.0880 | 42.59% | 0.0012 | 0.0964 |
|            |                       | <i>Erysipelotrichales</i>                |                                      |                   |        |         |        |        |        |



|            |            |                                          |                               |    |         |        |        |        |
|------------|------------|------------------------------------------|-------------------------------|----|---------|--------|--------|--------|
| Vegetables | Firmicutes | <i>Erysipelotrichaceae</i>               | <i>uncultured</i><br>organism | pd | -0.0550 | 10.44% | 0.0013 | 0.0998 |
|            |            | <i>Clostridia</i>   <i>Clostridiales</i> |                               |    |         |        |        |        |
|            |            | <i>Lachnospiraceae</i>                   |                               |    |         |        |        |        |

<sup>1</sup>For categorical features in MaAsLins analysis, the specific feature level for which the coefficient and significance of association is being reported.

<sup>2</sup>Prevalence of bacterial taxa in the study sample, equals to the total of number of samples in which the feature is non-zero divided by the total number of samples used in the model.

<sup>3</sup>*P* value for MaAsLin adjusted for age, sex, BMI, smoking status, alcohol consumption and physical activity; computed using the Maaslin2 package on R.

<sup>4</sup>Corrected *P* value by the Benjamini–Hochberg method (10% false discovery rate).

**Supplementary Table S6.** Sensitivity analysis of associations between food intakes and gut microbial profiles using MaAsLins among population from a single province,  $N=318$ .

| Food group    | Phylum        | Class       | Order | Family          | Genus                    | Species                  | Value  | Coef <sup>1</sup> | Coverage (%) <sup>2</sup> | Pval <sup>3</sup> | Qval <sup>4</sup> |
|---------------|---------------|-------------|-------|-----------------|--------------------------|--------------------------|--------|-------------------|---------------------------|-------------------|-------------------|
| Red meat      | Firmicutes    | Bacilli     |       | Lactobacillales | Weissella                | uncultured organism      | pd     | -0.0660           | 33.02%                    | <0.0001           | 0.0910            |
| Red meat      | Firmicutes    | Bacilli     |       | Lactobacillales | Weissella                |                          | pd     | -0.0661           | 33.96%                    | <0.0001           | 0.0910            |
| Cooked meat   | Firmicutes    | Clostridia  |       | Clostridiales   | Eubacterium xylanophilum | uncultured organism      | mul_pw | 0.0628            | 12.58%                    | <0.0001           | 0.0015            |
| Cooked meat   | Firmicutes    | Clostridia  |       | Clostridiales   | Eubacterium xylanophilum |                          | mul_pw | 0.0628            | 12.58%                    | <0.0001           | 0.0015            |
| Cooked meat   | Synergistetes | Synergistia |       | Synergistales   | Pyramidobacter           | Pyramidobacter piscolens | mul_pw | 0.0437            | 13.84%                    | <0.0001           | 0.0166            |
| Cooked meat   | Synergistetes | Synergistia |       | Synergistales   | Pyramidobacter           |                          | mul_pw | 0.0429            | 15.41%                    | <0.0001           | 0.0291            |
| Cooked meat   | Firmicutes    | Clostridia  |       | Clostridiales   | Ruminococcus 1           | uncultured organism      | mul_pw | 0.1148            | 22.33%                    | 0.0001            | 0.0941            |
| Whole grain   | Firmicutes    | Bacilli     |       | Lactobacillales | Leuconostoc              | uncultured organism      | mul_pw | -0.0086           | 23.90%                    | <0.0001           | 0.0134            |
| Whole grain   | Firmicutes    | Bacilli     |       | Lactobacillales | Leuconostoc              |                          | mul_pw | -0.0086           | 23.90%                    | <0.0001           | 0.0134            |
| Refined grain | Firmicutes    | Bacilli     |       | Lactobacillales | Lactobacillus            | uncultured organism      | pw     | 0.1901            | 14.78%                    | <0.0001           | <0.0001           |
| Refined grain | Firmicutes    | Bacilli     |       | Lactobacillales | Lactobacillus            | Lactobacillus mucosae    | pw     | 0.1333            | 21.70%                    | <0.0001           | 0.0072            |
| Vegetables    | Firmicutes    | Bacilli     |       | Lactobacillales | Lactobacillus            | uncultured               | pw     | 0.2231            | 14.78%                    | <0.0001           | <0.0001           |

|            |                       |                           |  |                          |                 |                            |                      |    |        |        |         |         |
|------------|-----------------------|---------------------------|--|--------------------------|-----------------|----------------------------|----------------------|----|--------|--------|---------|---------|
|            |                       | <i>Lactobacillaceae</i>   |  |                          | <i>organism</i> |                            |                      |    |        |        |         |         |
| Vegetables | <i>Firmicutes</i>     | <i>Bacilli</i>            |  | <i>Lactobacillales</i>   |                 | <i>Lactobacillus</i>       | <i>Lactobacillus</i> | pw | 0.1412 | 21.70% | <0.0001 | <0.0001 |
|            |                       | <i>Lactobacillaceae</i>   |  |                          |                 |                            | <i>mucosae</i>       |    |        |        |         |         |
| Vegetables | <i>Firmicutes</i>     | <i>Bacilli</i>            |  | <i>Lactobacillales</i>   |                 | <i>Lactobacillus</i>       |                      | pw | 0.2730 | 53.46% | <0.0001 | <0.0001 |
|            |                       | <i>Lactobacillaceae</i>   |  |                          |                 |                            |                      |    |        |        |         |         |
| Vegetables | <i>Firmicutes</i>     | <i>Clostridia</i>         |  | <i>Clostridiales</i>     |                 | <i>Ruminiclostridium 5</i> |                      | pd | 0.0118 | 59.43% | <0.0001 | 0.0268  |
|            |                       | <i>Ruminococcaceae</i>    |  |                          |                 |                            |                      |    |        |        |         |         |
| Cluster    | <i>Actinobacteria</i> | <i>Actinobacteria</i>     |  | <i>Bifidobacteriales</i> |                 | <i>Bifidobacterium</i>     |                      | C  | 0.0661 | 77.04% | <0.0001 | 0.0122  |
|            |                       | <i>Bifidobacteriaceae</i> |  |                          |                 |                            |                      |    |        |        |         |         |

<sup>1</sup>For categorical features in MaAsLins analysis, the specific feature level for which the coefficient and significance of association is being reported.

<sup>2</sup>Prevalence of bacterial taxa in the study sample, equals to the total of number of samples in which the feature is non-zero divided by the total number of samples used in the model.

<sup>3</sup>*P* value for MaAsLin adjusted for age, sex, BMI, smoking status, alcohol consumption and physical activity; computed using the Maaslin2 package on R.

<sup>4</sup>Corrected *P* value by the Benjamini–Hochberg method (10% false discovery rate).

**Supplementary Table S7.** Sensitivity analysis of associations between food intakes and gut microbial profiles using MaAsLins among population with normal BMI values,  $N=342$ .

| Food group    | Phylum                | Class   Order   Family                                                     | Genus                               | Species             | Value  | Coef <sup>1</sup> | Coverage (%) <sup>2</sup> | Pval <sup>3</sup> | Qval <sup>4</sup> |
|---------------|-----------------------|----------------------------------------------------------------------------|-------------------------------------|---------------------|--------|-------------------|---------------------------|-------------------|-------------------|
| Whole grain   | <i>Firmicutes</i>     | Negativicutes   Veillonellales   Veillonellaceae                           | Megasphaera                         | uncultured organism | mul_pd | 0.0639            | 13.45%                    | <0.0001           | 0.0016            |
| Whole grain   | <i>Firmicutes</i>     | Negativicutes   Veillonellales   Veillonellaceae                           | Megasphaera                         |                     | mul_pd | 0.0600            | 24.56%                    | <0.0001           | 0.0082            |
| Refined grain | <i>Firmicutes</i>     | Clostridia   Clostridiales   Ruminococcaceae                               | Eubacterium coprostanoligenes group | uncultured organism | pd     | -0.0428           | 15.50%                    | <0.0001           | 0.0218            |
| Refined grain | <i>Firmicutes</i>     | Clostridia   Clostridiales   Ruminococcaceae                               | Eubacterium coprostanoligenes group | uncultured organism | mul_pd | -0.0404           | 15.50%                    | 0.0001            | 0.0233            |
| Vegetables    | <i>Actinobacteria</i> | <i>Coriobacteriia</i>   <i>Coriobacteriales</i>   <i>Coriobacteriaceae</i> | <i>Collinsella</i>                  | uncultured organism | mul_pd | -0.1520           | 12.57%                    | <0.0001           | <0.0001           |
| Vegetables    | <i>Actinobacteria</i> | <i>Coriobacteriia</i>   <i>Coriobacteriales</i>   <i>Coriobacteriaceae</i> | <i>Collinsella</i>                  | uncultured organism | pd     | -0.1547           | 12.57%                    | <0.0001           | <0.0001           |
| Vegetables    | <i>Actinobacteria</i> | <i>Coriobacteriia</i>   <i>Coriobacteriales</i>   <i>Coriobacteriaceae</i> | <i>Collinsella</i>                  | uncultured organism | mul_pw | -0.1595           | 12.57%                    | <0.0001           | <0.0001           |
| Vegetables    | <i>Actinobacteria</i> | <i>Coriobacteriia</i>   <i>Coriobacteriales</i>   <i>Coriobacteriaceae</i> | <i>Collinsella</i>                  | uncultured organism | pw     | -0.1585           | 12.57%                    | <0.0001           | 0.0001            |
| Vegetables    | <i>Firmicutes</i>     | <i>Bacilli</i>   <i>Lactobacillales</i>   <i>Leuconostocaceae</i>          | <i>Leuconostoc</i>                  | uncultured organism | mul_pd | -0.0403           | 19.30%                    | <0.0001           | 0.0043            |
| Vegetables    | <i>Firmicutes</i>     | <i>Bacilli</i>   <i>Lactobacillales</i>   <i>Leuconostocaceae</i>          | <i>Leuconostoc</i>                  | uncultured organism | pd     | -0.0409           | 19.30%                    | <0.0001           | 0.0043            |
| Vegetables    | <i>Firmicutes</i>     | <i>Bacilli</i>   <i>Lactobacillales</i>   <i>Leuconostoc</i>               |                                     |                     | mul_pd | -0.0403           | 19.30%                    | <0.0001           | 0.0043            |

|            |            |                         |                        |                    |        |         |        |         |        |
|------------|------------|-------------------------|------------------------|--------------------|--------|---------|--------|---------|--------|
| Vegetables | Firmicutes | <i>Leuconostocaceae</i> |                        |                    | pd     | -0.0409 | 19.30% | <0.0001 | 0.0043 |
|            |            | <i>Bacilli</i>          | <i>Lactobacillales</i> | <i>Leuconostoc</i> |        |         |        |         |        |
| Vegetables | Firmicutes | <i>Leuconostocaceae</i> |                        |                    | mul_pw | -0.0415 | 19.30% | <0.0001 | 0.0063 |
|            |            | <i>Bacilli</i>          | <i>Lactobacillales</i> | <i>Leuconostoc</i> |        |         |        |         |        |
| Vegetables | Firmicutes | <i>Leuconostocaceae</i> |                        |                    | pd     | -0.0993 | 23.68% | <0.0001 | 0.0063 |
|            |            | <i>Clostridia</i>       | <i>Clostridiales</i>   | <i>Eubacterium</i> |        |         |        |         |        |
| Vegetables | Firmicutes | <i>Ruminococcaceae</i>  |                        |                    | mul_pw | -0.0415 | 19.30% | <0.0001 | 0.0063 |
|            |            | <i>Clostridia</i>       | <i>Clostridiales</i>   | <i>Eubacterium</i> |        |         |        |         |        |
| Vegetables | Firmicutes | <i>Ruminococcaceae</i>  |                        |                    | mul_pd | -0.0956 | 23.68% | <0.0001 | 0.0092 |
|            |            | <i>Clostridia</i>       | <i>Clostridiales</i>   | <i>Eubacterium</i> |        |         |        |         |        |
| Vegetables | Firmicutes | <i>Leuconostocaceae</i> |                        |                    | pw     | -0.0429 | 19.30% | 0.0001  | 0.0112 |
|            |            | <i>Bacilli</i>          | <i>Lactobacillales</i> | <i>Leuconostoc</i> |        |         |        |         |        |
| Vegetables | Firmicutes | <i>Leuconostocaceae</i> |                        |                    | pw     | -0.0429 | 19.30% | 0.0001  | 0.0112 |
|            |            | <i>Bacilli</i>          | <i>Lactobacillales</i> | <i>Leuconostoc</i> |        |         |        |         |        |
| Vegetables | Firmicutes | <i>Leuconostocaceae</i> |                        |                    | pw     | -0.1076 | 23.68% | 0.0001  | 0.0120 |
|            |            | <i>Clostridia</i>       | <i>Clostridiales</i>   | <i>Eubacterium</i> |        |         |        |         |        |
| Vegetables | Firmicutes | <i>Ruminococcaceae</i>  |                        |                    | mul_pw | -0.0900 | 23.68% | 0.0003  | 0.0519 |
|            |            | <i>Clostridia</i>       | <i>Clostridiales</i>   | <i>Eubacterium</i> |        |         |        |         |        |
| Vegetables | Firmicutes | <i>Ruminococcaceae</i>  |                        |                    | pw     | 0.0609  | 32.46% | 0.0005  | 0.0698 |
|            |            | <i>Clostridia</i>       | <i>Clostridiales</i>   | <i>Eubacterium</i> |        |         |        |         |        |
| Vegetables | Firmicutes | <i>Lachnospiraceae</i>  |                        |                    | pw     | 0.0688  | 62.87% | 0.0007  | 0.0929 |
|            |            | <i>Clostridia</i>       | <i>Clostridiales</i>   | <i>Eubacterium</i> |        |         |        |         |        |

|         |                       |                                                  |                         |                   |   |        |        |         |        |
|---------|-----------------------|--------------------------------------------------|-------------------------|-------------------|---|--------|--------|---------|--------|
|         |                       | <i>Lachnospiraceae</i>                           | <i>ventriosum group</i> |                   |   |        |        |         |        |
| Cluster | <i>Actinobacteria</i> | <i>Actinobacteria</i>   <i>Bifidobacteriales</i> | <i>Bifidobacterium</i>  |                   | B | 0.0651 | 78.36% | <0.0001 | 0.0057 |
|         |                       | <i>Bifidobacteriaceae</i>                        |                         |                   |   |        |        |         |        |
| Cluster | <i>Firmicutes</i>     | <i>Negativicutes</i>   <i>Veillonellales</i>     | <i>Megasphaera</i>      | <i>uncultured</i> | B | 0.0421 | 13.45% | 0.0004  | 0.0817 |
|         |                       | <i>Veillonellaceae</i>                           |                         | <i>organism</i>   |   |        |        |         |        |
| Cluster | <i>Actinobacteria</i> | <i>Actinobacteria</i>   <i>Bifidobacteriales</i> | <i>Bifidobacterium</i>  | <i>uncultured</i> | B | 0.0430 | 43.27% | 0.0005  | 0.0851 |
|         |                       | <i>Bifidobacteriaceae</i>                        |                         | <i>organism</i>   |   |        |        |         |        |

<sup>1</sup>For categorical features in MaAsLins analysis, the specific feature level for which the coefficient and significance of association is being reported.

<sup>2</sup>Prevalence of bacterial taxa in the study sample, equals to the total of number of samples in which the feature is non-zero divided by the total number of samples used in the model.

<sup>3</sup>*P* value for MaAsLin adjusted for age, sex, BMI, smoking status, alcohol consumption and physical activity; computed using the Maaslin2 package on R.

<sup>4</sup>Corrected *P* value by the Benjamini–Hochberg method (10% false discovery rate).

**Supplementary Table S8.** Contingency correlation coefficient between the region variable and dietary variables

| <b>Food group</b> | <b>Cramer's V</b> | <b>Pval</b> |
|-------------------|-------------------|-------------|
| Red meat          | 0.246             | <0.0001     |
| White meat        | 0.227             | <0.0001     |
| Eggs              | 0.279             | <0.0001     |
| Dairy             | 0.332             | <0.0001     |
| Cooked meat       | 0.256             | <0.0001     |
| Refined grain     | 0.252             | <0.0001     |
| Whole grain       | 0.368             | <0.0001     |
| Fruits            | 0.287             | <0.0001     |
| Vegetables        | 0.251             | <0.0001     |
| Cluster           | 0.462             | <0.0001     |

## Supplementary figure legends

**Supplementary Figure S1.** Workflow diagram for the subject enrollment and exclusion.

**Supplementary Figure S2.** Parallel analysis scree plot to determine the number of factors for factor analysis.

**Supplementary Figure S3.**  $\alpha$ -diversity indexes (richness, chao 1, simpson index, pielou index, ACE and faith-pd index in different intake frequency groups of red meat.

**Supplementary Figure S4.**  $\alpha$ -diversity indexes (richness, chao 1, simpson index, pielou index, ACE and faith-pd index in different intake frequency groups of white meat.

**Supplementary Figure S5.**  $\alpha$ -diversity indexes (richness, chao 1, simpson index, pielou index, ACE and faith-pd index in different intake frequency groups of cooked meat.

**Supplementary Figure S6.**  $\alpha$ -diversity indexes (richness, chao 1, simpson index, pielou index, ACE and faith-pd index in different intake frequency groups of eggs.

**Supplementary Figure S7.**  $\alpha$ -diversity indexes (richness, chao 1, simpson index, pielou index, ACE and faith-pd index in different intake frequency groups of dairy products.

**Supplementary Figure S8.**  $\alpha$ -diversity indexes (richness, chao 1, simpson index, pielou index, ACE and faith-pd index in different intake frequency groups of refined grain.

**Supplementary Figure S9.**  $\alpha$ -diversity indexes (richness, chao 1, simpson index, pielou index, ACE and faith-pd index in different intake frequency groups of whole grain.

**Supplementary Figure S10.**  $\alpha$ -diversity indexes (richness, chao 1, simpson index, pielou index, ACE and faith-pd index in different intake frequency groups of fruits.

**Supplementary Figure S11.**  $\alpha$ -diversity indexes (richness, chao 1, simpson index, pielou index, ACE and faith-pd index in different intake frequency groups of vegetables.



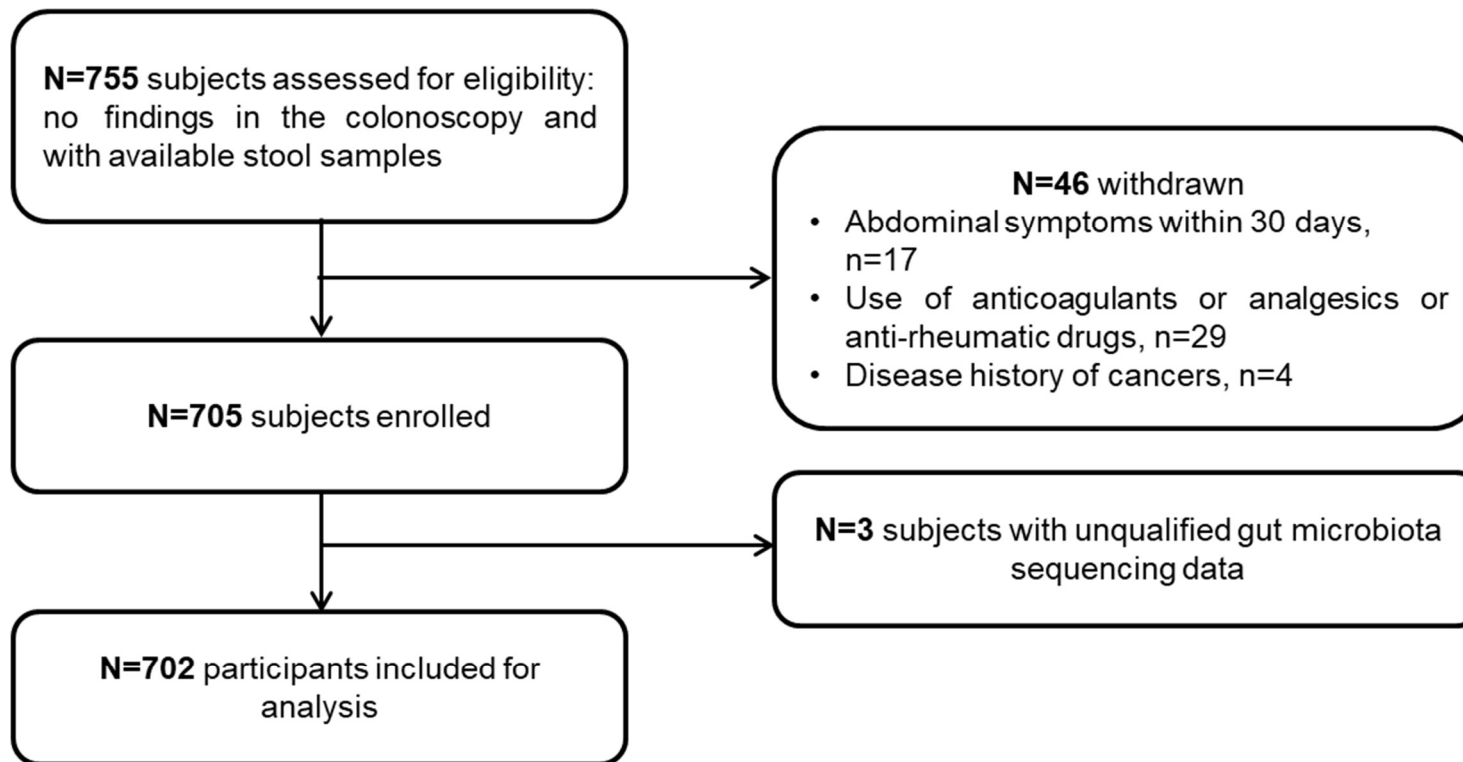

**Supplementary Figure S1.** Workflow diagram for the subjects enrollment and exclusion.

### Parallel Analysis Scree Plots

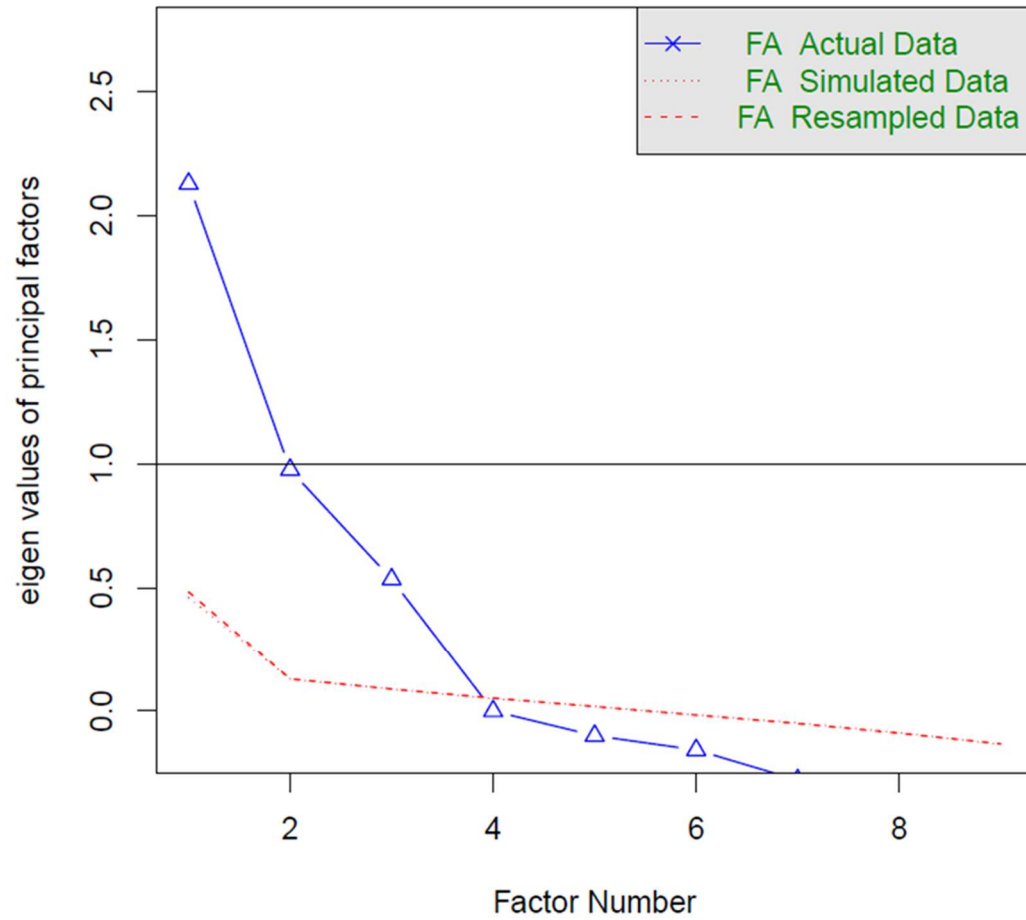

**Supplementary Figure S2.** Parallel analysis scree plot to determine the number of factors for factor analysis.

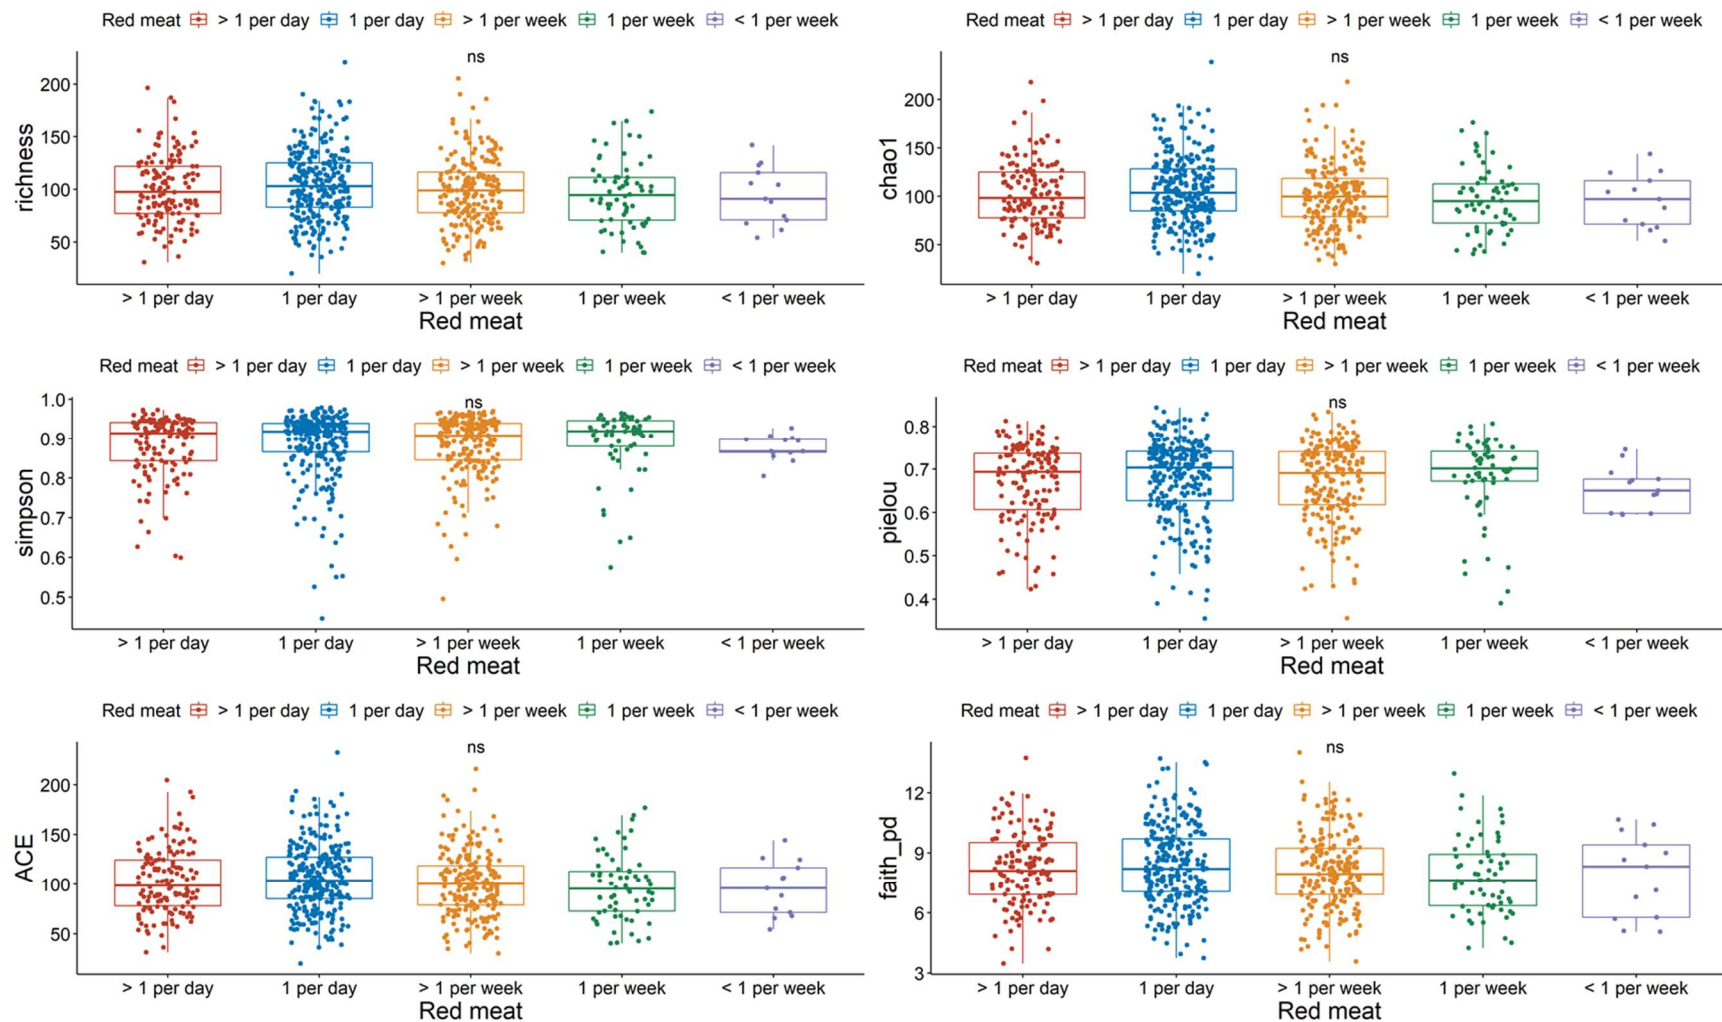

**Supplementary Figure S3.**  $\alpha$ -diversity indexes (richness, chao 1, simpson index, pielou index, ACE and faith-pd index in different intake frequency groups of red meat.

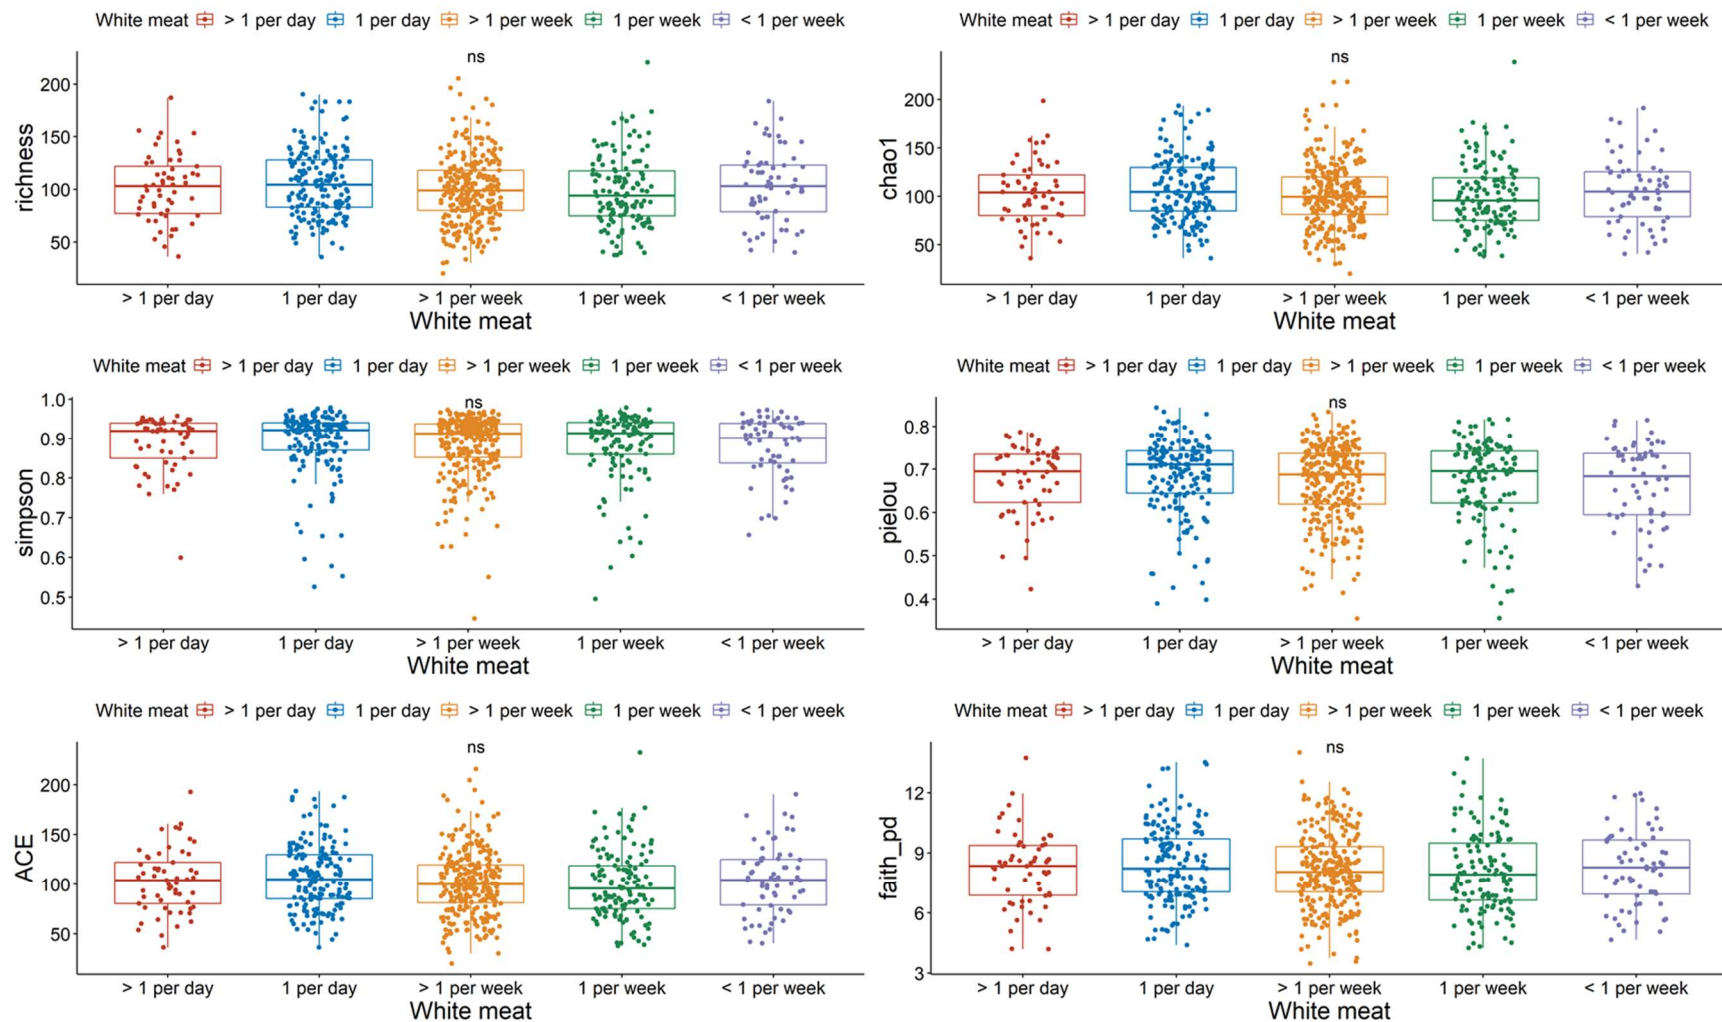

**Supplementary Figure S4.**  $\alpha$ -diversity indexes (richness, chao 1, simpson index, pielou index, ACE and faith-pd index in different intake frequency groups of white meat.

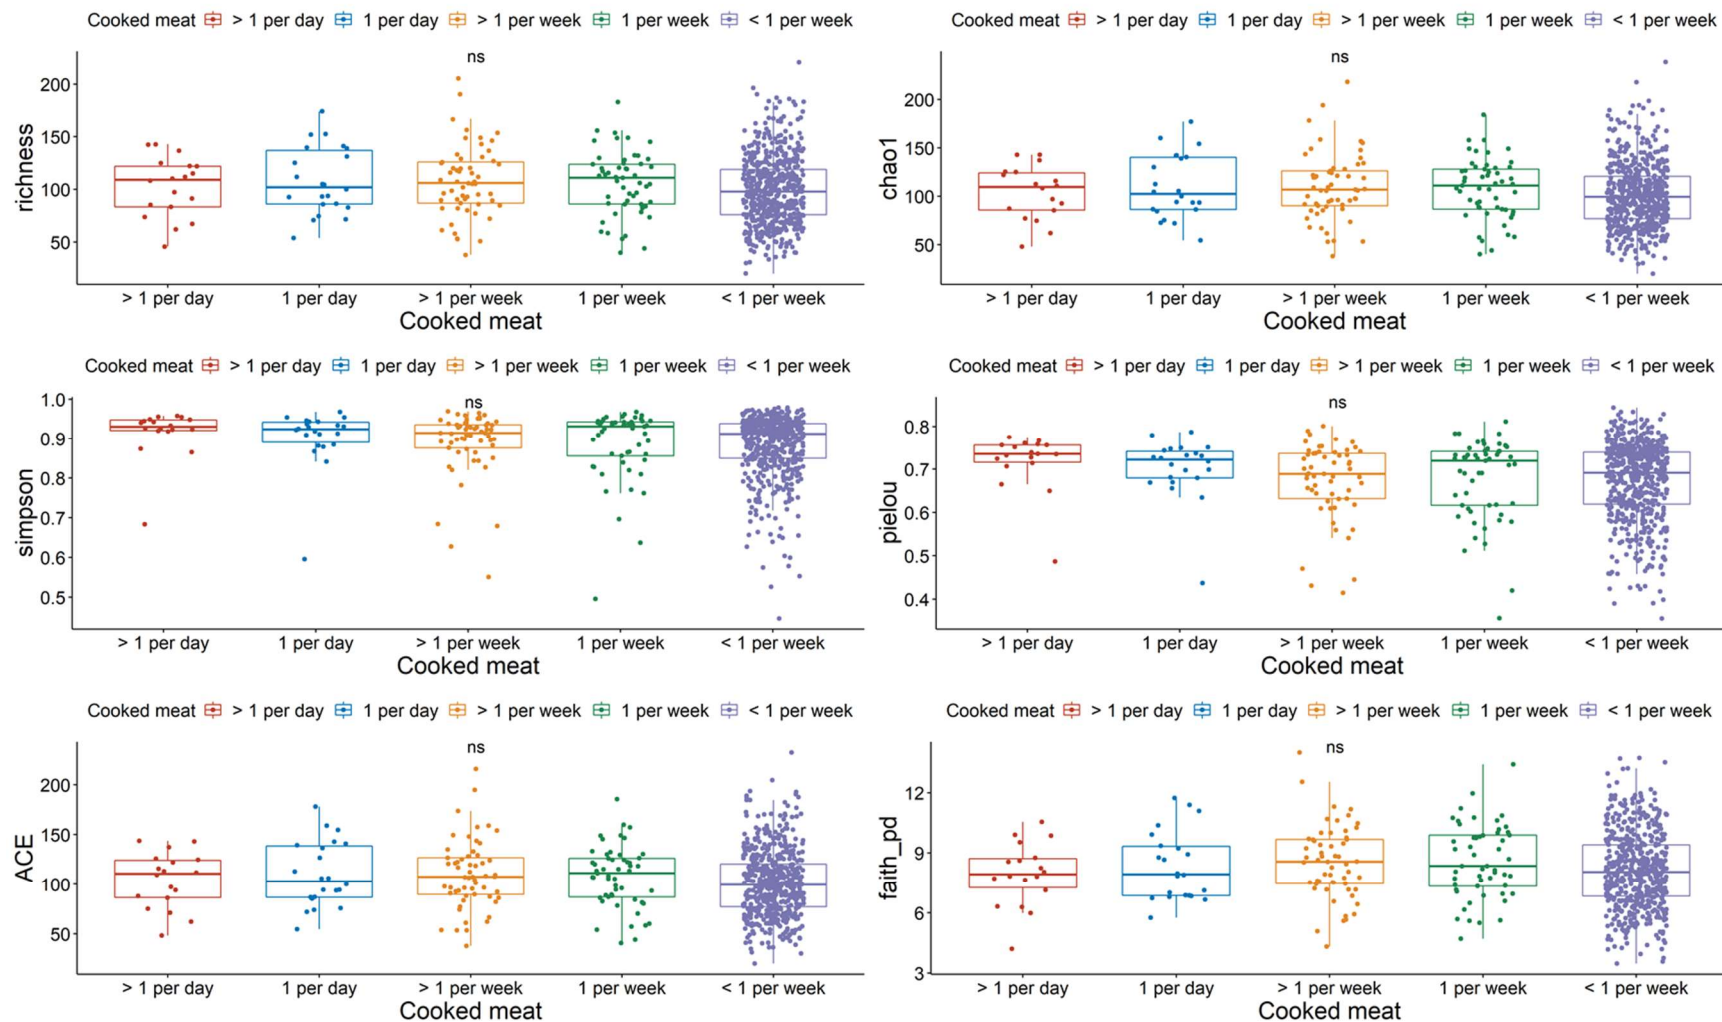

**Supplementary Figure S5.**  $\alpha$ -diversity indexes (richness, chao 1, simpson index, pielou index, ACE and faith-pd index in different intake frequency groups of cooked meat.



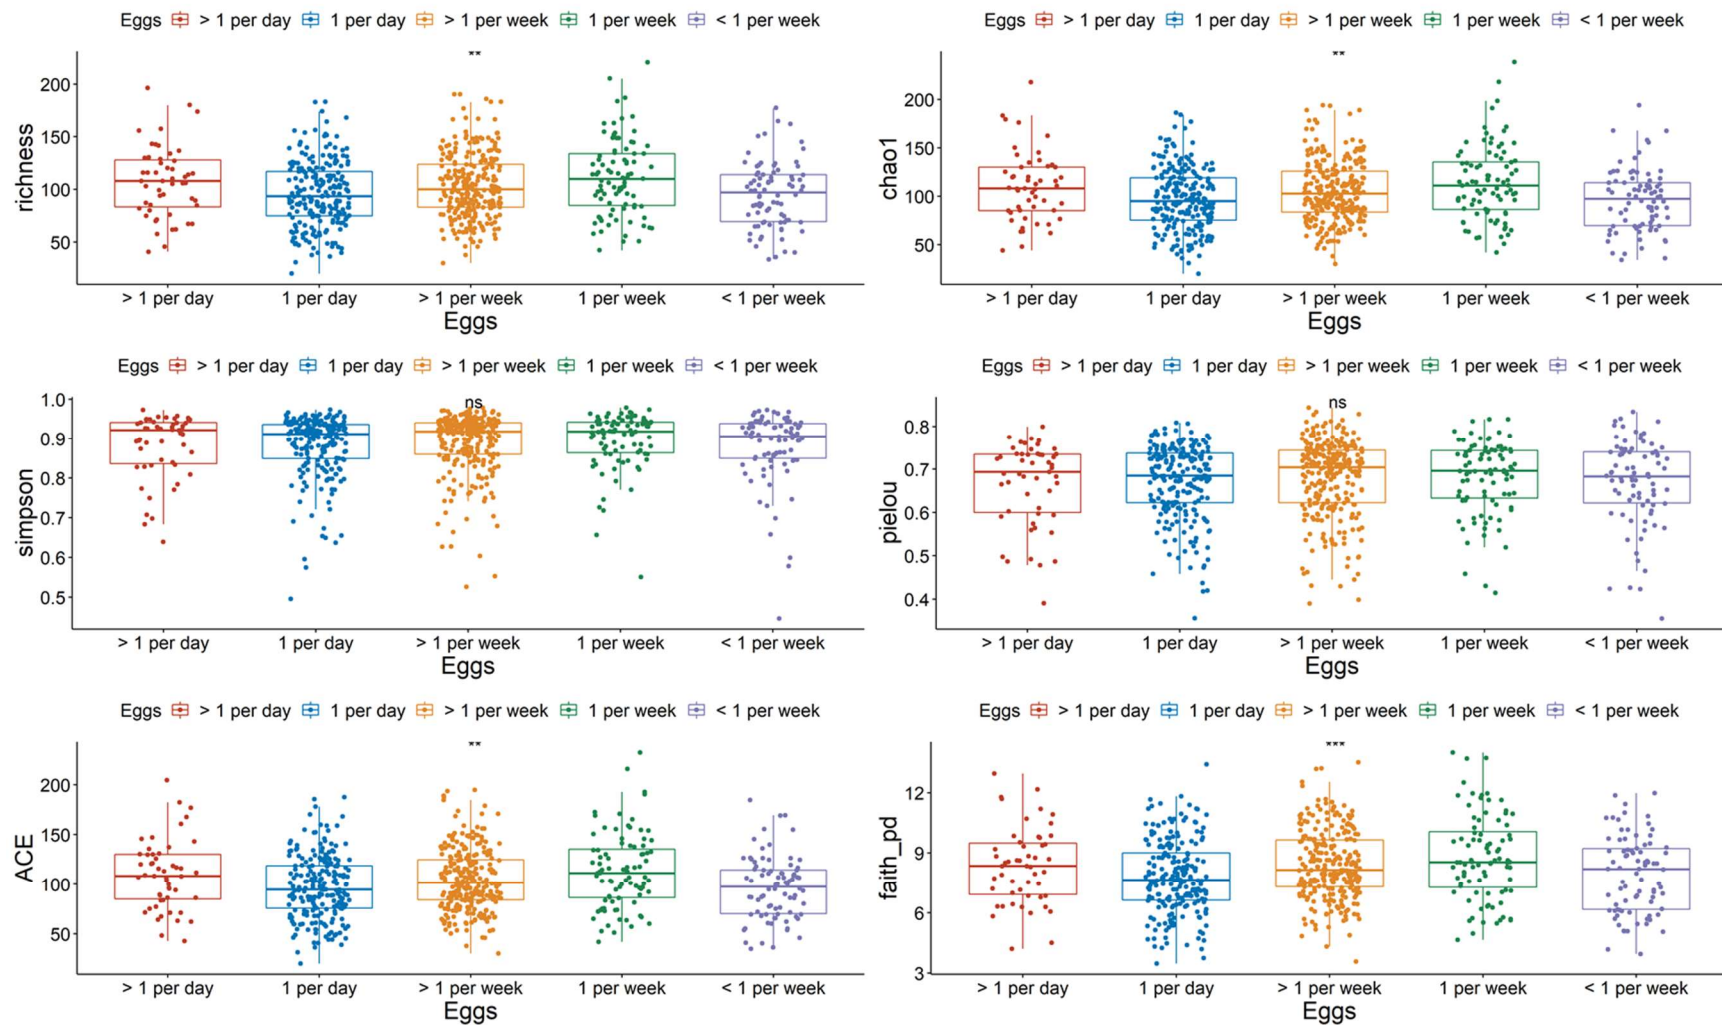

**Supplementary Figure S6.**  $\alpha$ -diversity indexes (richness, chao 1, simpson index, pielou index, ACE and faith-pd index in different intake frequency groups of eggs.

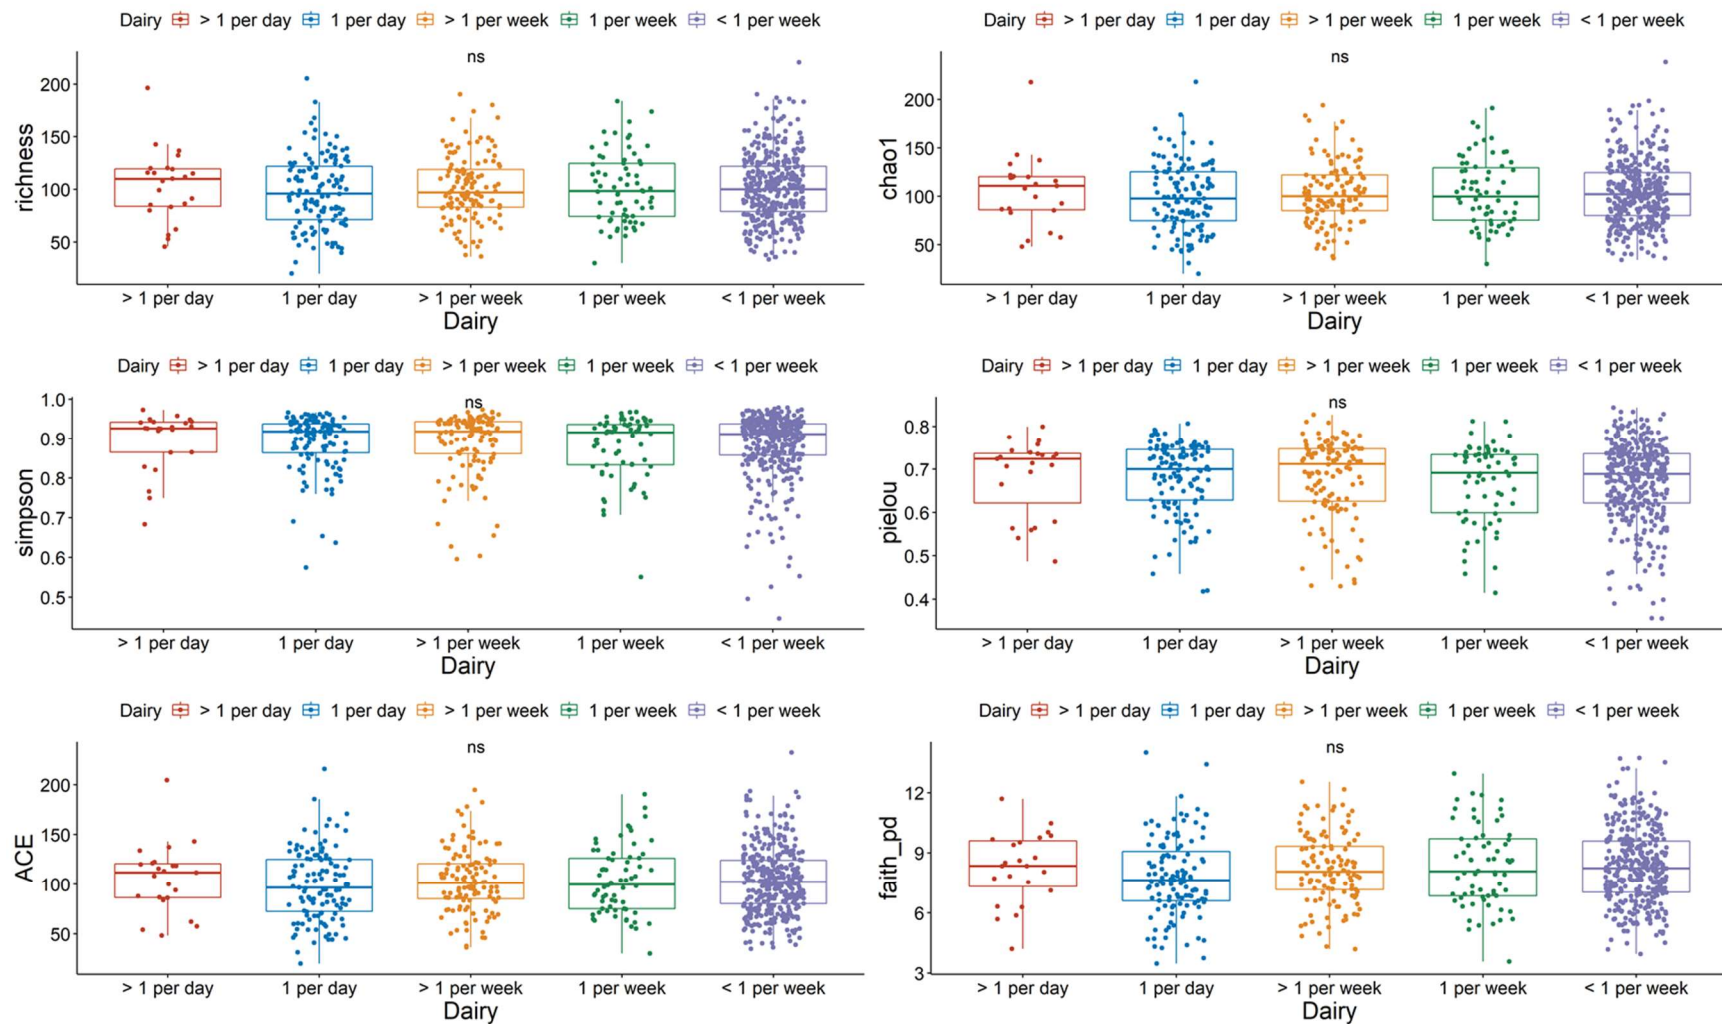

**Supplementary Figure S7.**  $\alpha$ -diversity indexes (richness, chao 1, simpson index, pielou index, ACE and faith-pd index in different intake frequency groups of dairy products.

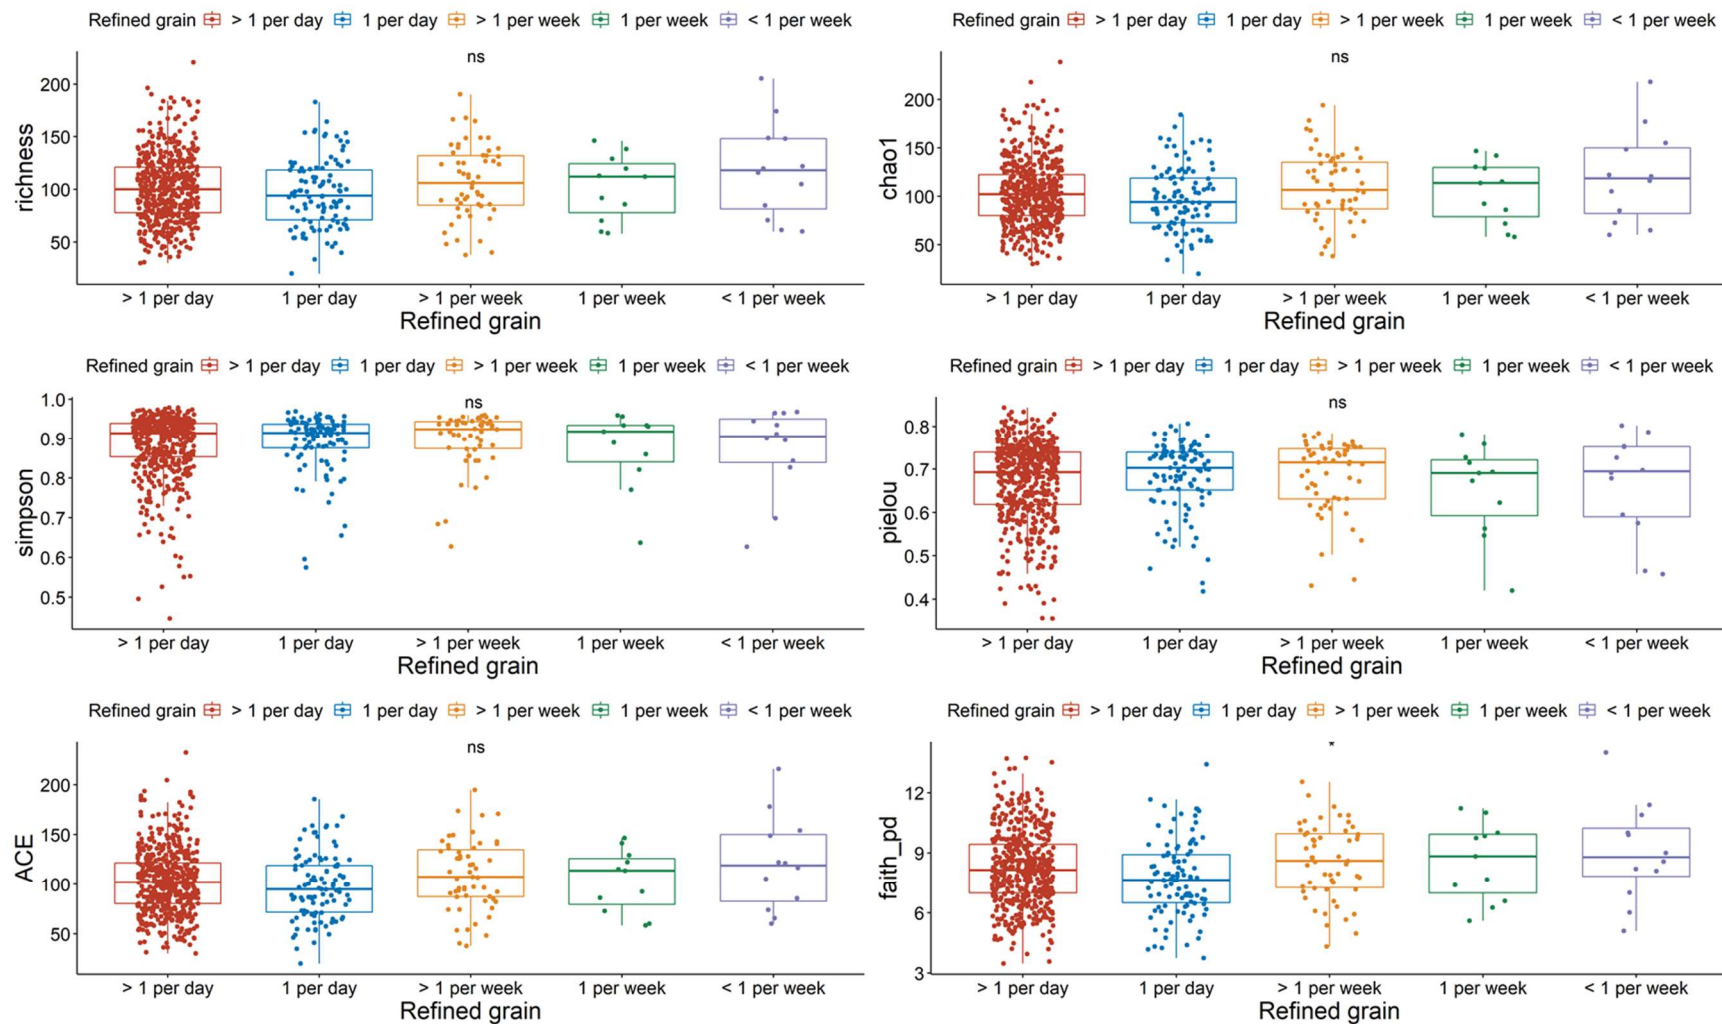

**Supplementary Figure S8.**  $\alpha$ -diversity indexes (richness, chao 1, simpson index, pielou index, ACE and faith-pd index in different intake frequency groups of refined grain.



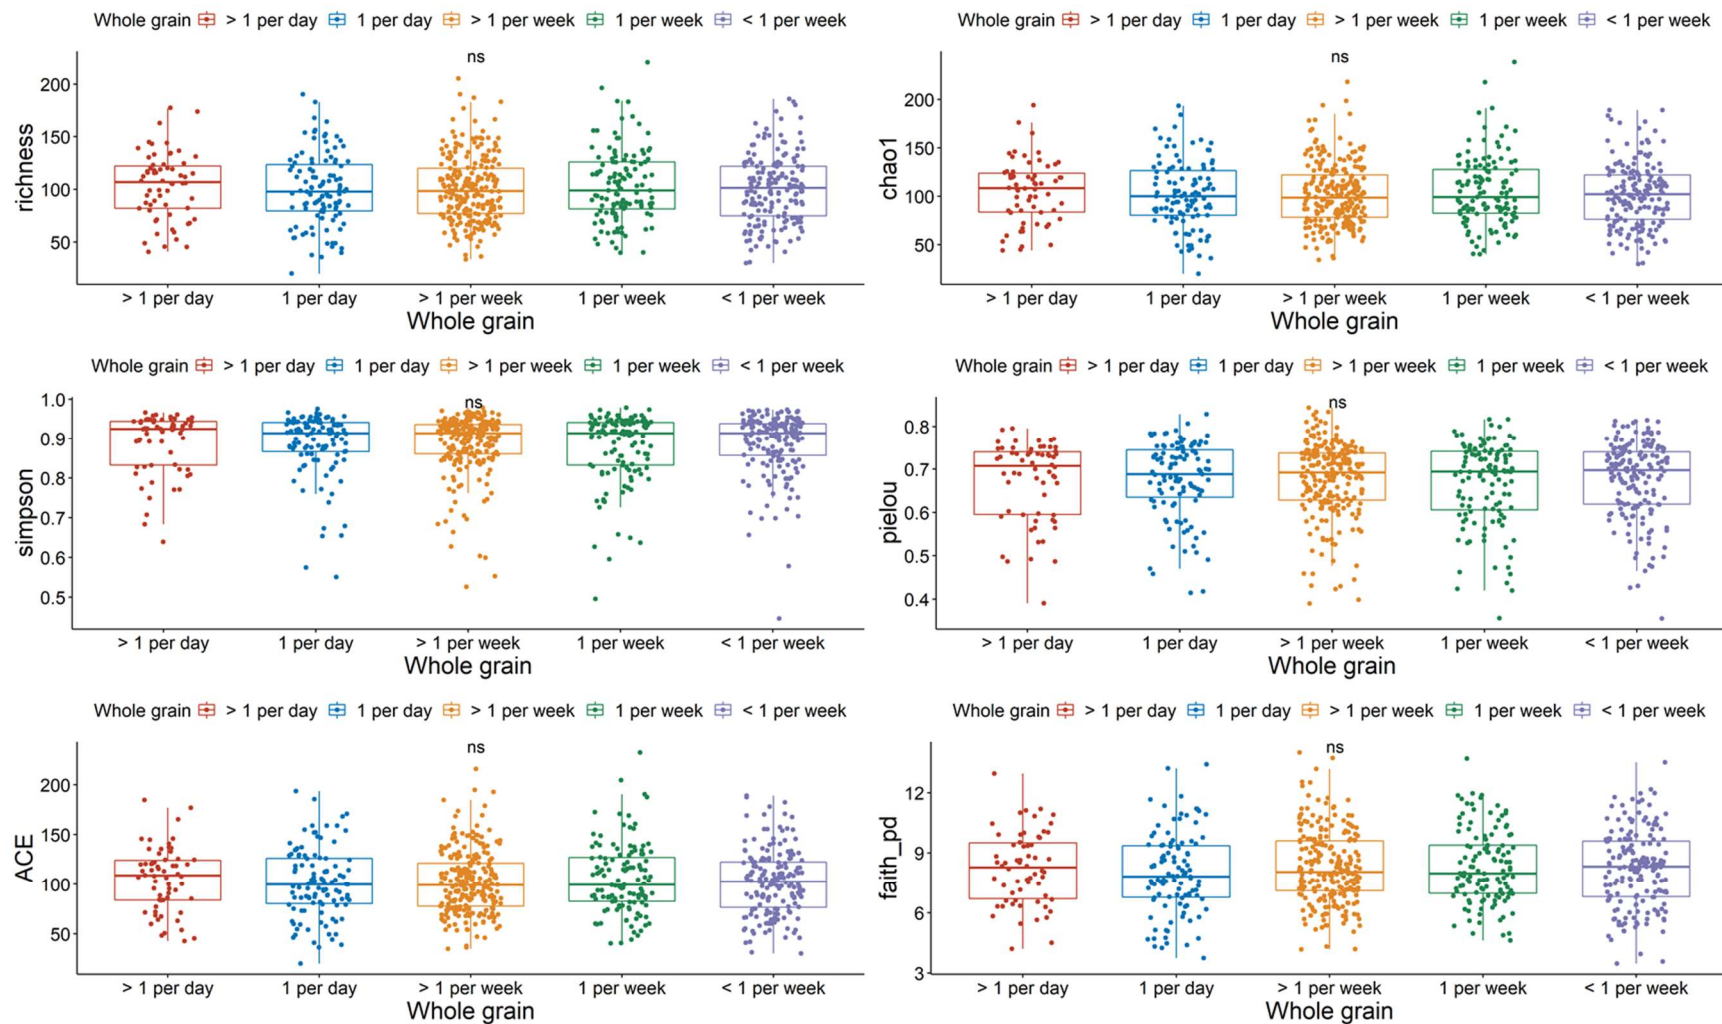

**Supplementary Figure S9.**  $\alpha$ -diversity indexes (richness, chao 1, simpson index, pielou index, ACE and faith-pd index in different intake frequency groups of whole grain.

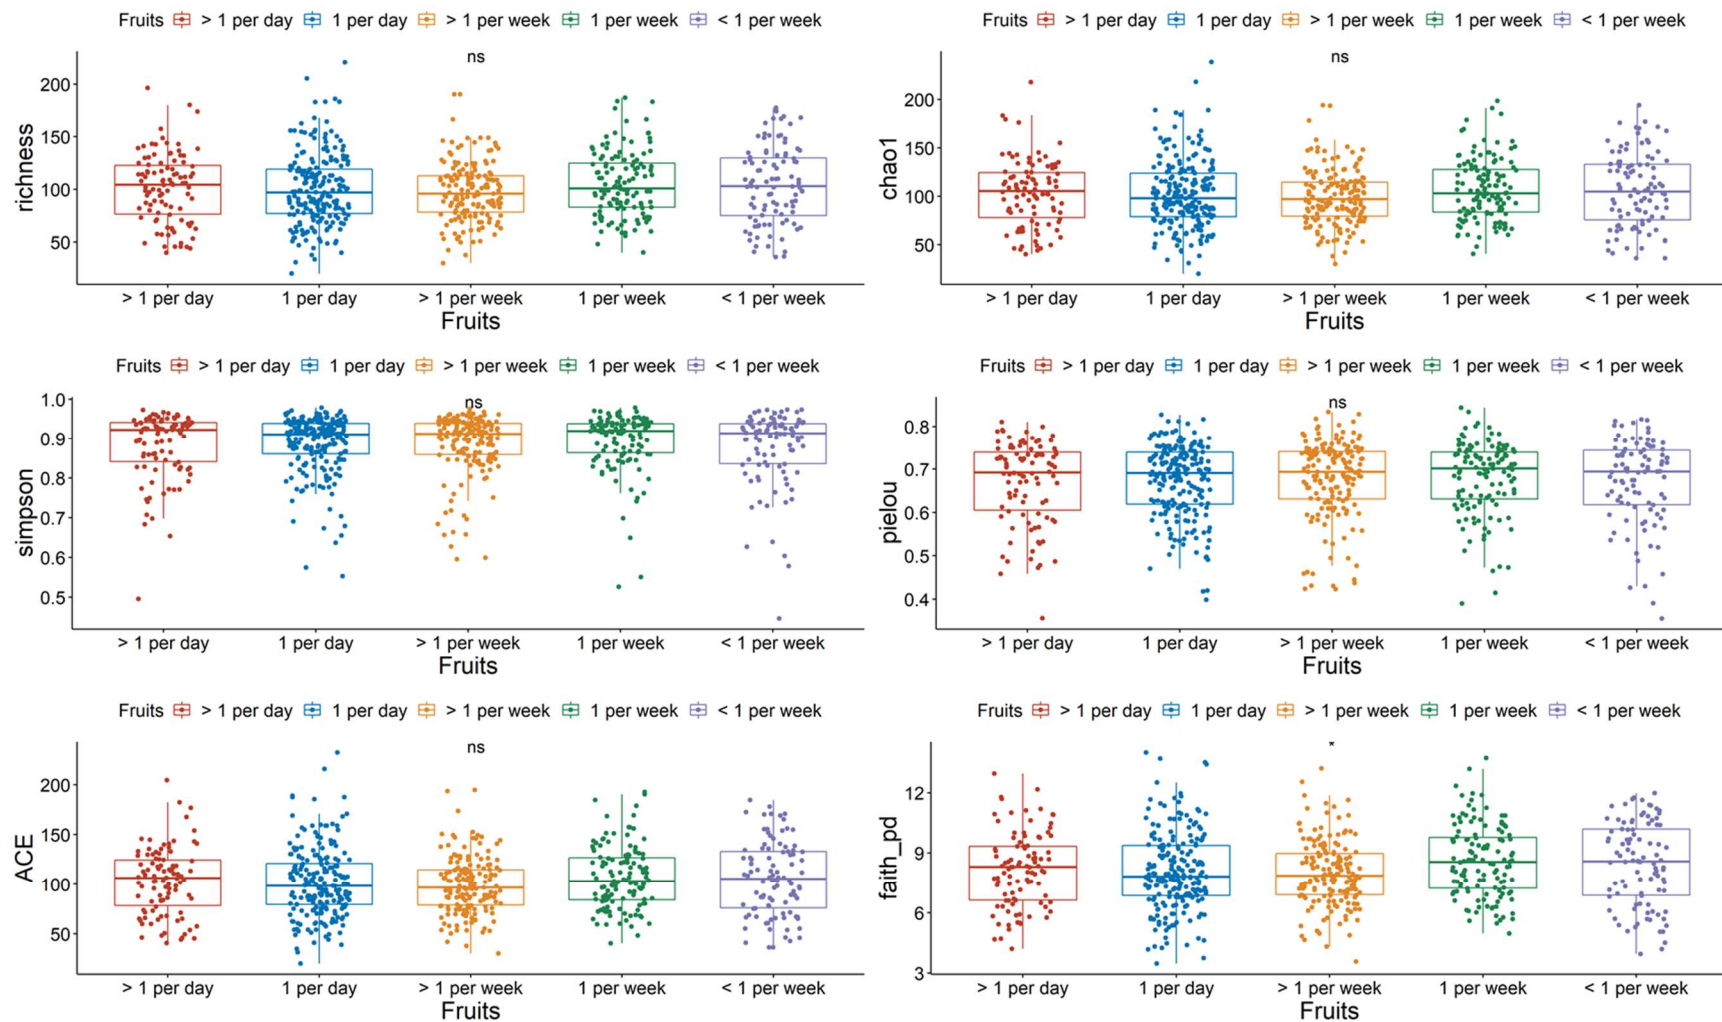

**Supplementary Figure S10.**  $\alpha$ -diversity indexes (richness, chao 1, simpson index, pielou index, ACE and faith-pd index in different intake frequency groups of fruits.

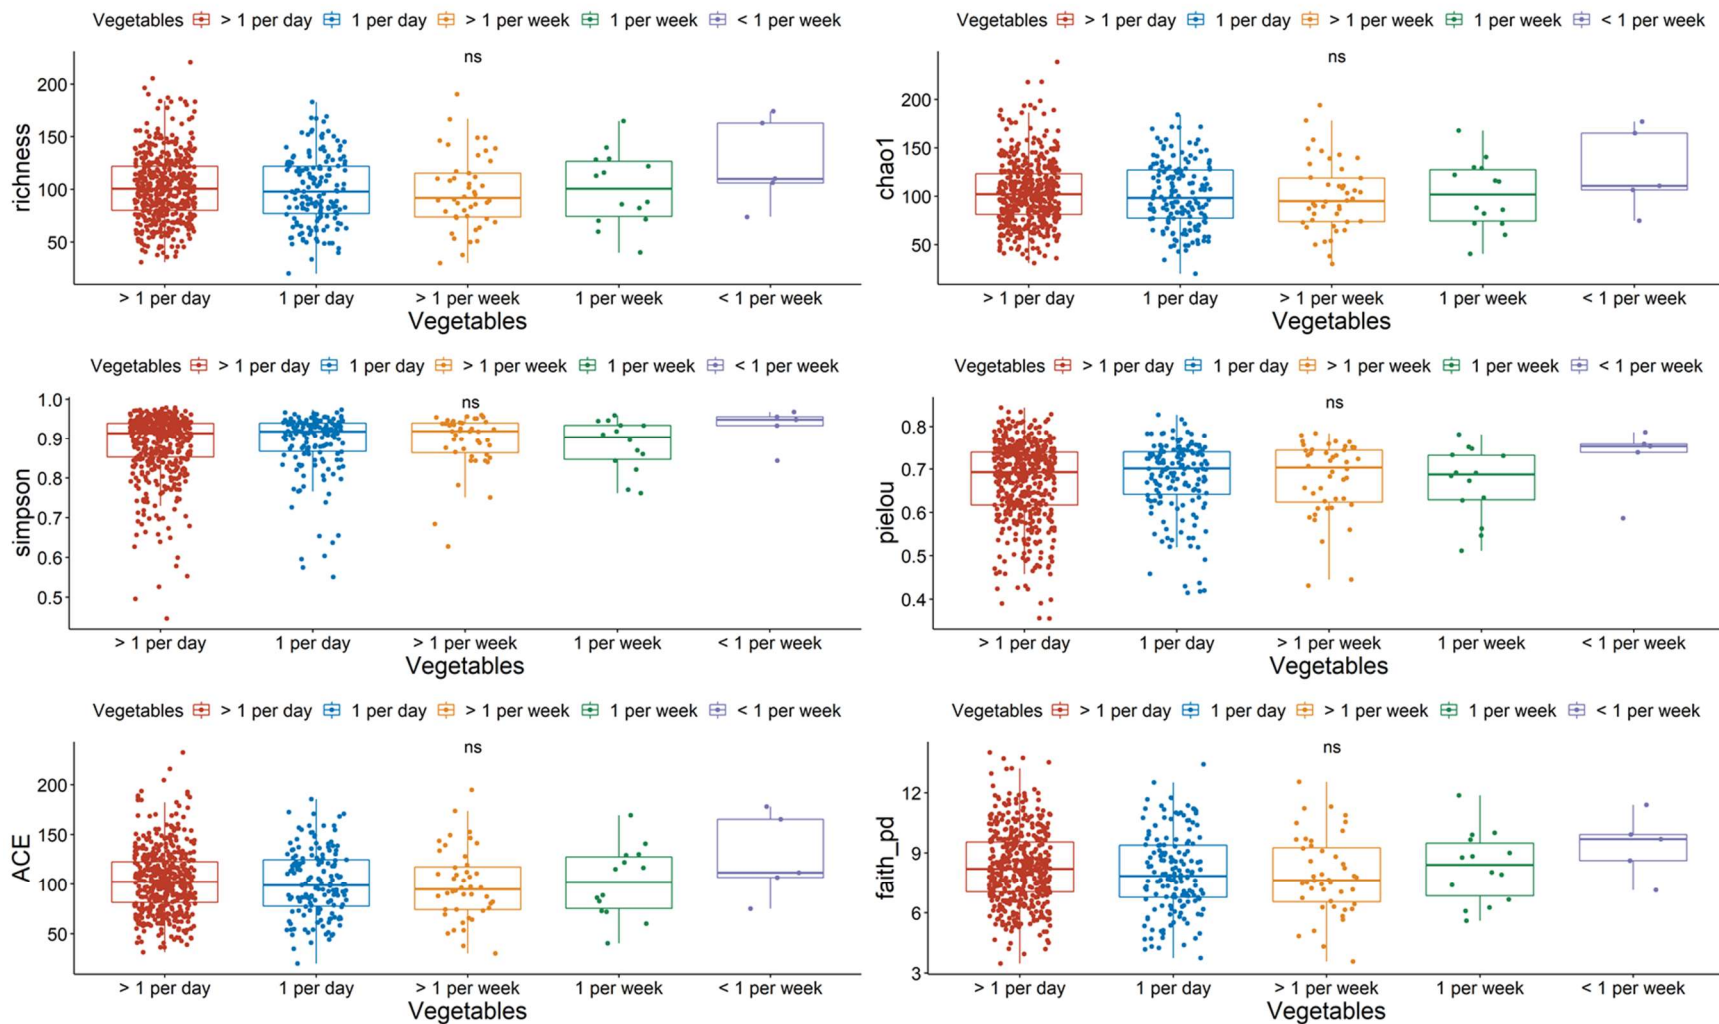

**Supplementary Figure S11.**  $\alpha$ -diversity indexes (richness, chao 1, simpson index, pielou index, ACE and faith-pd index in different intake frequency groups of vegetables.
